# Supplementary material
Source: PubMed Central journal article supplement (PMC4125485)
Supplement: NIHMS605410-supplement-1.pdf [file NIHMS605410-supplement-1.pdf]

**Supplementary Table 1**

**Real-time PCR Primers**

|          |   |                        |
|----------|---|------------------------|
| Roquin   | F | TCTTTGGGCAGCAGTAAGGG   |
|          | R | AGAGGCTTGAGGAAACCGTG   |
| Roquin-2 | F | CAATCTATGGGCCGCTGTC    |
|          | R | TTCCTTGAGAGGGCAGAACC   |
| PPP1R10  | F | AACCACCATCATGGGTTCGG   |
|          | R | AACGGGTCTGCAGGAGAATG   |
| HMGXB3   | F | GAGTTGGAGGCTTCTCAGCG   |
|          | R | AGGATCTTGCGGAAACCTGG   |
| IL-6     | F | CATCCTCGACGGCATCTCAG   |
|          | R | TCACCAGGCAAGTCTCCTC    |
| PAQR8    | F | AACGTCTGGACCCATTTACTG  |
|          | R | CAGGTGAGGTAAGTGATTGACG |
| GAPDH    | F | AGGTGAAGGTCGGAGTCAACGG |
|          | R | CGTTCTCAGCCTTGACGGTGC  |

### **Supplementary Note 1 - Sub-domains II and III of the ROQ domain have structural homology with helix-turn-helix and winged-helix motifs**

The WH-B domain in the RING ubiquitin ligases typically makes contact with a RING domain. Although Roquin does contain a RING domain (Fig. 1a), it may be located near the N terminus of the ROQ domain and therefore too far from the WH motif in domain III (Fig. 1c). A conserved Lys residue in the WH-B domains that can be covalently modified by ubiquitin-like proteins is equivalent to Glu212 in the ROQ domain, although a highly conserved Lys205 is in the vicinity of this residue in the structure (Supplementary Fig. 2a). It remains to be seen whether this or other lysine residues in domain III of Roquin can be covalently modified.

For the overlay between sub-domains II and III of the ROQ domain, the rms distance is 2.1 Å for 44 equivalent C $\alpha$  atoms, and the sequence conservation is 16% (*Z* score 3.8, indicating a more remote similarity between the two domains).

### **Supplementary Note 2 - Interactions of Hmg<sub>19</sub> RNA with the ROQ domain**

The two ROQ-Hmg<sub>19</sub> complexes in the asymmetric unit have essentially the same conformation, with rms distance of 0.4 Å among the equivalent C $\alpha$  atoms of the ROQ domain.

In the 5' arm of the stem, the phosphate groups of the third and especially the fourth nucleotides are located near the N-terminal end of helix  $\alpha$ G (Fig. 2d). In addition, the side chains of Ser238 and Thr240 ( $\alpha$ G) are hydrogen-bonded to the phosphate groups. The side chains of Lys239 ( $\alpha$ G) and Lys220 ( $\alpha$ F) are located near the phosphate groups of the fifth and sixth nucleotides of the stem, respectively, although they have weak electron density. The backbone phosphate group of G<sub>11</sub>, at the top of the 3' arm of the stem, has ionic interactions with the side chain of Arg251 ( $\alpha$ G) (Fig. 2b), representing the only direct contact between the A site and the 3' arm of the stem.

From the U<sub>8</sub>G<sub>9</sub>U<sub>10</sub> tri-loop, the U<sub>8</sub> base lies against the  $\beta$ 2- $\beta$ 3 loop and is  $\pi$ -stacked with the peptide bond between residues 263 and 264 in this loop (Fig. 2b). The backbone phosphate group of U<sub>8</sub> is located near the N-terminus of helix  $\alpha$ F, having favorable interactions with the dipole of this helix. The U<sub>10</sub> base lies against the C-terminal end of helix  $\alpha$ G and is also hydrogen-bonded to the side chain of Ser253, although these interactions cannot distinguish between U and C. The G<sub>9</sub> base is stacked with the C<sub>7</sub>-G<sub>11</sub> base pair at the top of the stem on one face, and the guanidinium group of Arg219 ( $\alpha$ F) on the other face. The base also interacts with the side chain of Gln247 ( $\alpha$ G). The stacking and especially the hydrogen-bonding interactions may select for a purine over pyrimidines, explaining the fact that all the CDEs identified so far have a purine at this

position of the loop (Supplementary Fig. 3a)<sup>5</sup>. The phosphate group of G<sub>9</sub> is hydrogen-bonded to Tyr250 ( $\alpha$ G).

In the 5' flanking region of the Hmg<sub>19</sub> RNA, the phosphate groups of the first and second nucleotides in the stem are located near the side chain of Arg188 ( $\alpha$ D), but it has weak electron density (Fig. 2d). Together with Trp184, these are the few direct contacts between the RNA and domain II of the ROQ domain.

Residues Arg188, Lys220 and Lys239 contribute to the electropositive nature of the interface with Hmg<sub>19</sub> RNA (Supplementary Fig. 4), even though their side chains have weak electron density. The equivalent surface area in several other WH motifs also mediates the binding of nucleic acids, for example SelB in complex with the SECIS RNA (Supplementary Fig. 2b)<sup>19</sup>. However, the binding modes of these nucleic acids and their interactions with the protein are rather different from that of Hmg<sub>19</sub>. Nonetheless, the structural analysis indicates that the ROQ domain utilizes the same surface area to recognize the CDE stem-loop, despite negligible sequence conservation with other WH motifs.

### **Supplementary Note 3 - Formation of double-stranded RNA by TNF<sub>23</sub>**

We first suspected that the formation of the TNF<sub>23</sub> duplex occurred because of the high concentration of the RNA (300  $\mu$ M) that was used during annealing, as we observed a dimer of the ROQ-TNF<sub>23</sub> complex on the gel filtration column, while the ROQ domain alone was monomeric. We then reduced the concentration of the TNF<sub>23</sub> RNA during annealing to 40  $\mu$ M, but the resulting complex with the ROQ domain was still dimeric. We further reduced the concentration of the RNA to 4.4  $\mu$ M at annealing, incubated with the ROQ domain at the same concentration, and then concentrated to 14  $\mu$ M before gel filtration. The results still showed predominantly a dimer of the ROQ-TNF<sub>23</sub> complex. Finally, we annealed the RNA at 4.4  $\mu$ M and then further diluted it to  $\sim$ 0.4  $\mu$ M in the mixture with the ROQ domain. The gel filtration profile showed a 1:1 complex, suggesting a stem-loop structure for the RNA.

Therefore, this transition between the stem-loop and duplex structures may be an inherent property of TNF<sub>23</sub>, which may be consistent with earlier data showing that the CDE can form different structures<sup>5</sup>. In addition, theoretical calculations, with the program mfold<sup>34</sup>, showed that the free energy of formation for the stem-loop is only  $-3.3$  kcal/mol for the TNF<sub>23</sub> RNA, while that for the duplex is  $-12$  kcal/mol. Therefore, the stem-loop conformation for TNF<sub>23</sub> is likely to exist only at low concentrations (for example under physiological conditions), probably  $\sim$ 1  $\mu$ M based on our data (Supplementary Fig. 5). At concentrations that are needed for structural studies, formation of the duplex is probably unavoidable. In comparison, the free energy of

formation for the Hmg<sub>19</sub> stem-loop is  $-7.7$  kcal/mol, consistent with its higher GC content. As a result, we only observed the stem-loop conformation of this RNA from our structural studies (Fig. 1c).

#### **Supplementary Note 4 - Interactions of TNF<sub>23</sub> RNA with the ROQ domain**

The overall structures of the two ROQ domains in the asymmetric unit are similar to each other, with rms distance of  $0.6$  Å among their equivalent C $\alpha$  atoms (Supplementary Fig. 6c). The  $\beta$ -sheet in domain III is completely ordered in one complex, while some of its residues (257-264) are disordered in the other complex. In domain I, part of the loop connecting helices  $\alpha$ A and  $\alpha$ B is disordered in one complex.

On the other hand, differences in the bound positions of the TNF<sub>23</sub> RNA relative to the ROQ domain are observed, especially for the basal part of the stem and the 5' and 3' flanking sequences where there are also structural differences between the two RNAs (Supplementary Fig. 6d), indicating conformational flexibility in the RNA itself and plasticity in its interaction with the ROQ domain. In one complex, the U<sub>1</sub> uridine base is flipped out (Supplementary Fig. 5) and forms a bidentate hydrogen bond with Asn349 in a neighboring ROQ domain in the crystal. The preceding A<sub>-1</sub> nucleotide from the 5' flanking sequence base-stacks with G<sub>2</sub> and forms a base pair with G<sub>17</sub> (Supplementary Fig. 8a). In the other complex, both U<sub>1</sub> and A<sub>-1</sub> are disordered and G<sub>17</sub> does not have a base-pairing partner. For the 3' flanking nucleotides, only G<sub>+1</sub> is observed in both complexes.

For the 5' arm, nucleotides U<sub>4</sub>, U<sub>5</sub> and U<sub>6</sub> have hydrogen-bonding interactions with the protein, including residues Ser315, Gln318, Ser319, Asp322 and Lys323 from helix  $\alpha$ J in domain II (Fig. 3c). For the 3' arm, the nucleotides near the end of the duplex contact the side chains of residues Arg135 and Lys136 in helix  $\alpha$ B, and Ser160 and Arg164 in helix  $\alpha$ C of domain I (Fig. 3d). The G<sub>17</sub> base has bidentate hydrogen-bonding interactions with the side-chain guanidinium group of Arg131 ( $\alpha$ B) in the complex where U<sub>1</sub> is disordered (Supplementary Fig. 6a). In the complex where the U<sub>1</sub> base is ordered but flipped out, the G<sub>17</sub> residue assumes a different conformation in order to base pair with A<sub>-1</sub> (Supplementary Fig. 6b). The G<sub>17</sub> base thereby occupies the position of the Arg131 side chain, which instead is hydrogen-bonded to G<sub>+1</sub> in the 3' flanking sequence, as well as being  $\pi$ -stacked with the G<sub>17</sub> base. Several water molecules also mediate the protein-RNA interactions.

## References

- <sup>34</sup> Zucker, M. Mfold web server for nucleic acid folding and hybridization prediction. *Nucl. Acid Res.* **31**, 3406-3415 (2003).
